# Supplementary material for: Modelling the physical properties change of canned glutinous rice porridge during cooking
Source: Royal Society of Chemistry journal article supplement (doi:10.1039/c8ra07790h), 2019-01-01

The relationships between sterilization temperature and  $D_0$  (Moisture content (Fig. S1); Normalized hardness (Fig. S2)) were acquired by linear regression.

**Fig. S1**

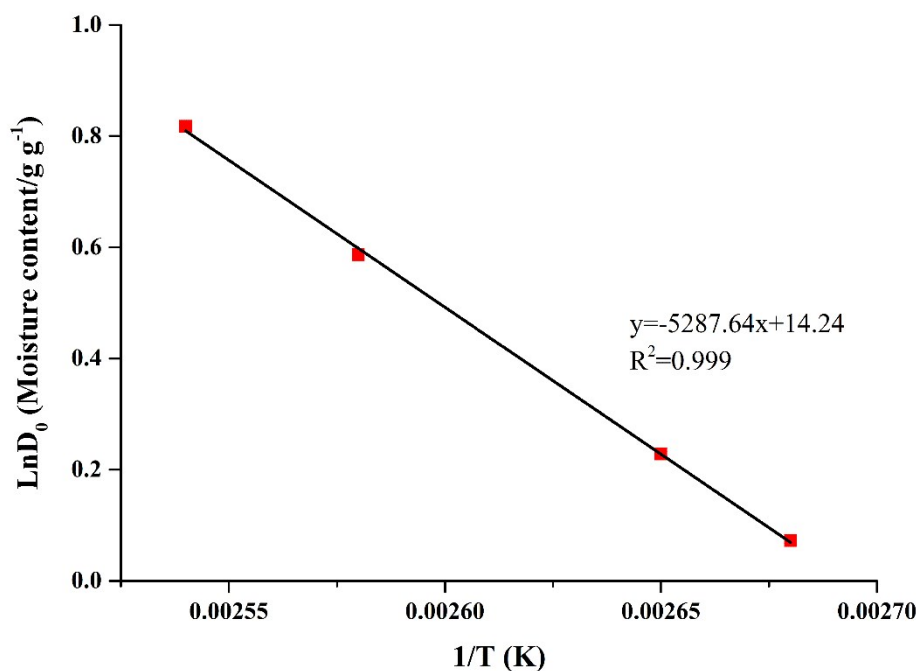

**Fig. S2**

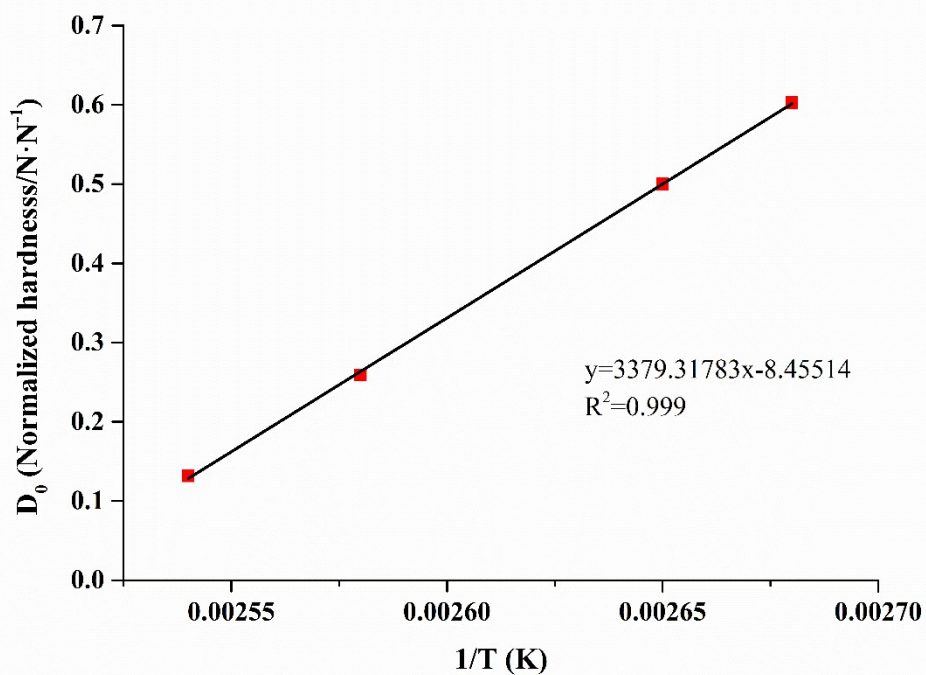

Supplement: c8ra07790h1.pdf [file c8ra07790h1.pdf]
